# Supplementary material for: Novel microstructure quantification framework for databasing, visualization, and analysis of microstructure data
Source: Springer Nature journal article supplement (doi:10.1186/2193-9772-2-3), 2013-07-02
Supplement: 40192_2013_6_MOESM1_ESM.pdf [file 40192_2013_6_MOESM1_ESM.pdf]

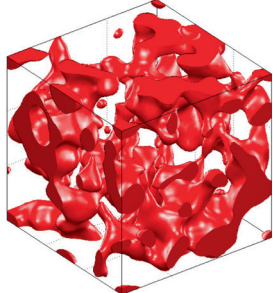

(a) Class 1:  $\Sigma = [10\ 10\ 10]$

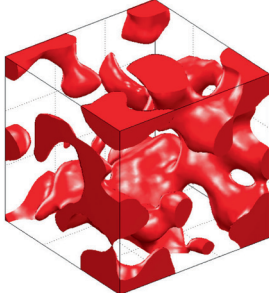

(b) Class 2:  $\Sigma = [15\ 15\ 15]$

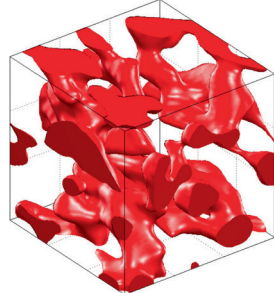

(c) Class 3:  $\Sigma = [20\ 10\ 10]$

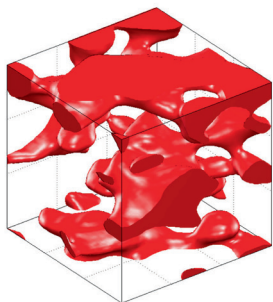

(d) Class 4:  $\Sigma = [20\ 20\ 10]$

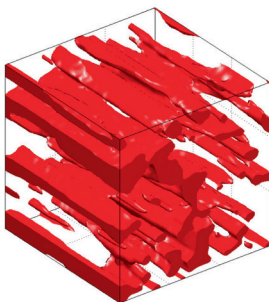

(e) Class 5:  $\Sigma = [50\ 5\ 5]$

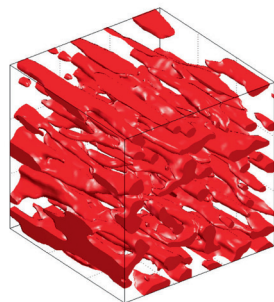

(f) Class 6:  $\Sigma = [20\ 5\ 2.5]$

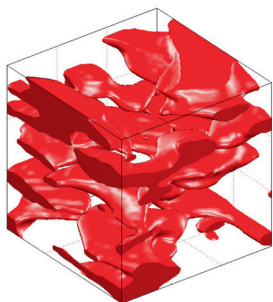

(g) Class 7:  $\Sigma = [25\ 20\ 5]$

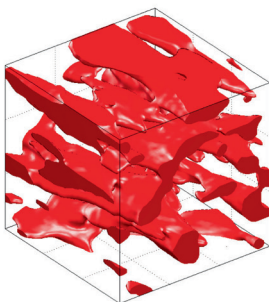

(h) Class 8:  $\Sigma = [30\ 10\ 5]$

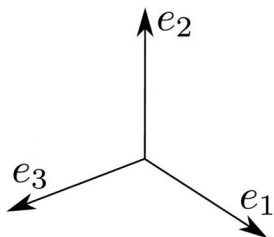

(i) Coordinate Axes
