# Supplementary material for: Novel microstructure quantification framework for databasing, visualization, and analysis of microstructure data
Source: Springer Nature journal article supplement (doi:10.1186/2193-9772-2-3), 2013-07-02

**Training Set**

**Validation Set**

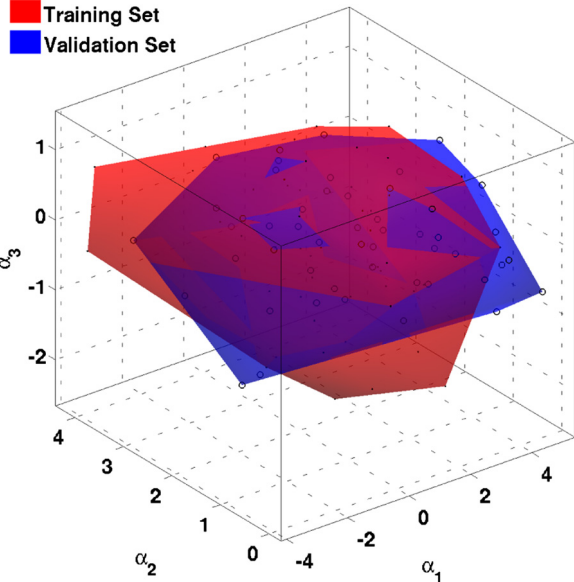

Supplement: 40192_2013_6_MOESM9_ESM.pdf [file 40192_2013_6_MOESM9_ESM.pdf]
