# Supplementary material for: Novel microstructure quantification framework for databasing, visualization, and analysis of microstructure data
Source: Springer Nature journal article supplement (doi:10.1186/2193-9772-2-3), 2013-07-02
Supplement: 40192_2013_6_MOESM10_ESM.pdf [file 40192_2013_6_MOESM10_ESM.pdf]

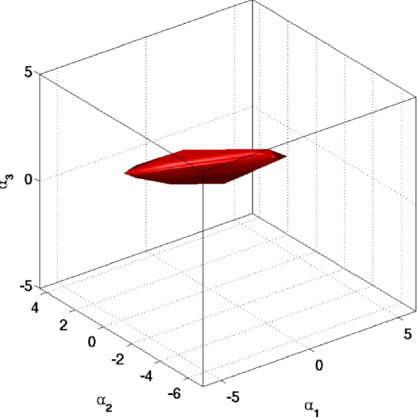

(a) Hull for microstructure class 1

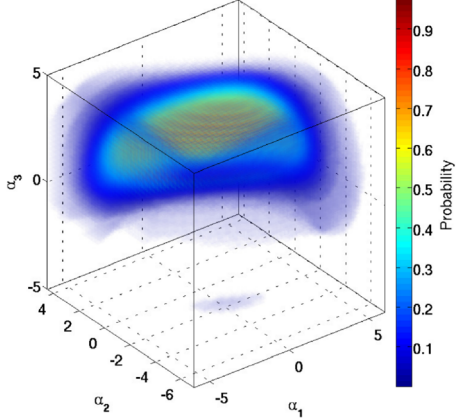

(b) Probability cloud of assignment to class 1
