# Supplementary material for: Novel microstructure quantification framework for databasing, visualization, and analysis of microstructure data
Source: Springer Nature journal article supplement (doi:10.1186/2193-9772-2-3), 2013-07-02
Supplement: 40192_2013_6_MOESM13_ESM.pdf [file 40192_2013_6_MOESM13_ESM.pdf]

Accuracy of Reduced Order  $C_{11}$  Model

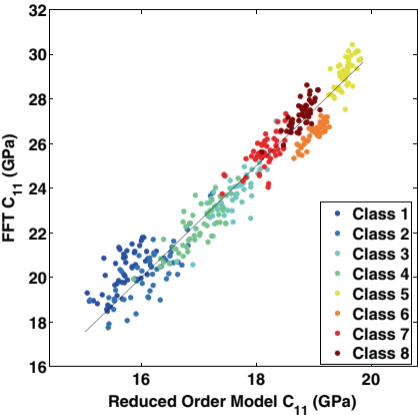

(a) Modulus  $C_{11}$  Model Validation

Accuracy of Reduced Order  $\sigma_{\text{yield}}$  Model

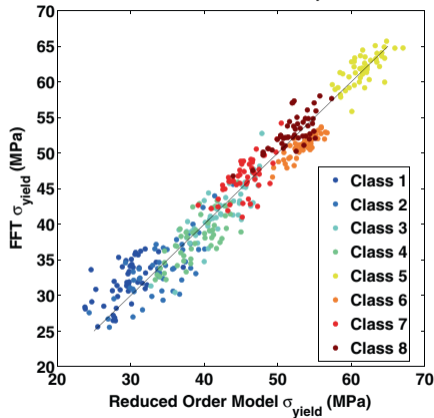

(b) Yield Stress Model Validation
